# Supplementary material for: Exploring the gendered mental health experiences of adolescents in Gaza during the Covid-19 pandemic
Source: Oxford University Press journal article supplement (doi:10.1525/agh.2022.1730691), 2022-01-01
Supplement: 1730691-supplementary-table.docx [file 1730691-supplementary-table.docx]

**Table S1- Adolescent experiences during Covid-19, and pre-existing vulnerabilities**

| **Variables** | **Boys** | | | | **Girls** | | | | | **Sig** |
| --- | --- | --- | --- | --- | --- | --- | --- | --- | --- | --- |
| No | | % | | No | | | % | |
| **Health and nutrition-related challenges** | | | | | | | | | | |
| Adolescent self-reported health (very) good | | 226 | | 90 | | 227 | 89.4 | | .804 | |
| Adolescent self-reported health worse after Covid | | 42 | | 16.7 | | 52 | 20.5 | | .280 | |
| Adolescent was unable to see a health care provider due to Covid-19 (among sick only) | | 14 | | 27.5 | | 36 | 30.5 | | .529 | |
| Adolescent was unable to get medications due to Covid (among sick only) | | 8 | | 9.4 | | 14 | 15.9 | | .200 | |
| Married girls reported difficulty accessing sexual and reproductive health (SRH) services (n=50) | |  | |  | | 29 | 58 | |  | |
| Facing difficulties in accessing SRH has increased during Covid-19 (n=214) | |  | |  | | 24 | 48.0 | |  | |
| Adolescent faces any challenge for menstrual hygiene management (MHM) (among girls that had reached menarche) | |  | |  | | 58 | 27.1 | |  | |
| Adolescent is fearful or embarrassed to ask family for MHM support | |  | |  | | 124 | 57.9 | |  | |
| Adolescent has challenges getting MHM products (among girls that had reached menarche) (n=214) | |  | |  | | 49 | 22.9 | |  | |
| Adolescent faces challenge of not enough MHM supplies (among girls that had reached menarche) | |  | |  | | 46 | 21.5 | |  | |
| Adolescent (partially) agrees fearful to ask family for MHM support (among girls) | |  | |  | | 76 | 35.5 | |  | |
| Adolescent faces challenge of not enough soap or water for MHM (among girls) (n=214) | |  | |  | | 35 | 16.4 | |  | |
| Adolescent faces challenge of privacy for MHM (among female adolescents that had reached menarche) | |  | |  | | 32 | 15.0 | |  | |
| **Food security** | | | | | | | | | | |
| Experienced hunger in the past 4 weeks | | 107 | | 42.6 | | 97 | 38.2 | | .309 | |
| Experienced hunger more often in past 4 weeks due to Covid | | 76 | | 30.3 | | 61 | 24 | | .113 | |
| Adolescent meals less likely to contain protein | | 116 | | 46.2 | | 79 | 31.2 | | .001* | |
| Adolescent decreased consumption of vitamin A-rich vegetables/fruits | | 76 | | 30.3 | | 61 | 24.0 | | .113 | |
| Adolescent decreased consumption of other vegetables/fruits | | 116 | | 46.2 | | 91 | 35.8 | | .018* | |
| Adolescent decreased consumption of milk/milk products | | 85 | | 33.9 | | 93 | 36.6 | | .518 | |
| **Mean adolescent own dietary diversity reduction score (0–4)** | | **1.40** | | | | **1.27** | | | **.282** | |
| **Education and learning-related challenges** | | | | | | | | | | |
| Adolescent enrolled in formal school before Covid-19 began | | 192 | | 76.5 | | 205 | 80.7 | | .248 | |
| Family provides support for formal school education during closure (among enrolled) | | 146 | | 76.0 | | 170 | 82.9 | | .089 | |
| Family is home-schooling | | 46 | | 31.5 | | 37 | 21.8 | | .050* | |
| Family is helping with schoolwork | | 85 | | 58.2 | | 83 | 48.8 | | .095 | |
| Family is giving space to study | | 114 | | 78.1 | | 138 | 81.2 | | .495 | |
| Family is reducing adolescent’s chores | | 34 | | 23.3 | | 64 | 37.6 | | .006* | |
| Household in contact with a formal school teacher in past 7 days (among enrolled) | | 109 | | 56.8 | | 139 | 67.8 | | .023* | |
| Formal school teacher has provided feedback in past 7 days (among enrolled) | | 87 | | 45.3 | | 119 | 58.0 | | .011* | |
| Reporting that lack of or unreliable internet is a challenge for learning during Covid | | 46 | | 24 | | 69 | 33.7 | | .033* | |
| Reporting that lack of or unreliable electricity is a challenge for learning during Covid | | 18 | | 9.4 | | 17 | 8.3 | | .704 | |
| **Bodily integrity and violence-related challenges** | | | | | | | | | | |
| Bullying from siblings is a challenge | | 75 | | 30 | | 79 | 38.7 | | .051 | |
| There is more violence towards boys (such as spanking/hitting) in the household (+15) n=301 | | 99 | | 65.6 | | 104 | 69.3 | | .485 | |
| There is more violence towards girls (such as spanking/hitting) in the household (+15) n=301 | | 87 | | 57.6 | | 101 | 67.3 | | .082 | |
| Adolescent girls are facing more bullying and violence from male siblings (+15) n=298 | | 97 | | 65.1 | | 109 | 73.2 | | .132 | |
| There is more violence towards women from male family members (+15) n=299 | | 97 | | 65.1 | | 109 | 73.2 | | .132 | |
| There is more violence from police towards people who go out illegally during lockdown (+15) n=301 | | 106 | | 69.7 | | 96 | 64.4 | | .327 | |
| Parents yelling at adolescent as challenge | | 131 | | 52.6 | | 92 | 45.3 | | .123 | |
| Parents yelling at adolescent has increased | | 100 | | 40.2 | | 64 | 31.5 | | .058 | |
| Father hitting mother as challenge | | 65 | | 26.1 | | 56 | 27.6 | | .723 | |
| Father hitting mother has increased | | 50 | | 20.1 | | 41 | 20.2 | | .975 | |
| Parent hitting adolescent as challenge | | 96 | | 38.7 | | 62 | 30.4 | | .065 | |
| Parent hitting adolescent has increased | | 61 | | 24.6 | | 46 | 22.5 | | .610 | |
| Other family abuse (withholding food) as challenge | | 29 | | 11.7 | | 31 | 15.2 | | .275 | |
| Other family abuse (withholding food) has increased | | 24 | | 9.7 | | 21 | 10.3 | | .827 | |
| Family pressure to get married has increased | | 15 | | 6 | | 44 | 21.6 | | .001* | |
| **Mean combined violence index reported by all adolescents (0–4)** | | **1.28** | | | | **1.22** | | | **.598** | |
| **Mean combined increase in violence index identified by all adolescents (0–4) as a challenge** | | **1.56** | | | | **1.66** | | | **.509** | |
| **Connectedness-related challenges** | | | | | | | | | | |
| Adolescent agrees/partially agrees that household (HH) stress increased after Covid | | 171 | | 68.4 | | 165 | 65 | | 413 | |
| HH is getting angry quickly and/or arguing more often | | 147 | | 58.6 | | 149 | 58.7 | | .983 | |
| Adolescent gets more support during Covid | | 74 | | 29.5 | | 95 | 37 | | .059 | |
| Adolescent gets less support during Covid | | 47 | | 18.7 | | 27 | 10.6 | | .010* | |
| Adolescent gives more support during Covid | | 88 | | 35.3 | | 80 | 31.7 | | .394 | |
| Adolescent gives less support during Covid | | 40 | | 16.1 | | 27 | 10.7 | | .079 | |
| Adolescent has a friend s/he can trust | | 144 | | 57.4 | | 138 | 54.3 | | .492 | |
| Adolescent has an adult s/he can trust | | 173 | | 68.9 | | 176 | 69.3 | | .929 | |
| Adolescent has no contact with friends in 7 days | | 52 | | 20.7 | | 85 | 33.5 | | .001* | |
| Adolescent spoke/ messaged on phone, social media, or online games in the past 7 days | | 133 | | 53 | | 161 | 63.4 | | .018* | |
| **Livelihoods-related challenges (caregivers’ responses)** | | | | | | | | | | |
| Households lost employment permanently or temporarily due to Covid | | | | | | 143 | 28.4 | |  | |
| Households lost at least some income due to Covid | | | | | | 291 | 57.7 | |  | |
| Families cannot afford to buy enough food to eat or are changing what they eat | | | | | | 386 | 96.5 | |  | |
| Families are worried that they will not be able to meet daily HH needs | | | | | | 403 | 80.0 | |  | |
| Household was unable to buy essential food items in past 7 days | | | | | | 218 | 45.0 | |  | |
| Unable to buy essential hygiene items in past 7 days | | | | | | 212 | 46.1 | |  | |
| **Voice and agency-related challenges** | | | | | | | | | | |
| Adolescent spoken/hung out/ played with friends in person in past 7 days | | 111 | | 44.2 | | 15 | 5.9 | | .001* | |
| Adolescent spends more time on household chores and/or childcare since Covid began | | 173 | | 68.9 | | 189 | 74.4 | | .171 | |
| Experiencing complete/moderate mobility restriction | | 196 | | 78.1 | | 212 | 83.5 | | .125 | |
| Adolescent stayed home in past 7 days | | 42 | | 17 | | 123 | 48.4 | | .001* | |
| **Pre-existing vulnerabilities at the community level** | | | | | | | | | | |
| Many people have lost their jobs or their ability to earn wages, and some have lost their business | | | | | | 380 | 95.5 | |  | |
| For people who are still working, wages have decreased | | | | | | 387 | 97.0 | |  | |
| There is an increase in begging in the community | | | | | | 307 | 78.5 | |  | |
| Many households are selling assets to cope with economic downfall | | | | | | 369 | 93.4 | |  | |
| Many families have to tolerate/ turn to debts | | | | | | 392 | 98.2 | |  | |
| HH receives cash transfer from any organisation | | | | | | 169 | 33.5 | |  | |
| Adolescent agrees that there is social cohesion in the community | | 107 | | 70.9 | | 117 | 77.5 | | .189 | |
| Adolescent thinks that family helps to cope with the pandemic | | 211 | | 84.1 | | 233 | 91.7 | | .008* | |
| Adolescent thinks that friends help to cope with the pandemic | | 138 | | 55 | | 148 | 58.3 | | .456 | |
| Adolescent is currently volunteering | | 23 | | 9.2 | | 5 | 2 | | .001* | |

* *Statistically significant*
